# Supplementary material for: The impact of landfast sea ice buttressing on ice dynamic speedup in the Larsen-B Embayment, Antarctica
Source: Copernicus journal article supplement (doi:10.5194/tc-2023-128), 2023-09-06

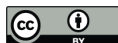

# The impact of landfast sea ice buttressing on ice dynamic speedup in the Larsen-B Embayment, Antarctica

Trystan Surawy-Stepney<sup>1</sup>, Anna E. Hogg<sup>1</sup>, Stephen L. Cornford<sup>2</sup>, Benjamin J. Wallis<sup>1</sup>, Benjamin J. Davison<sup>1</sup>, Heather L. Selley<sup>1</sup>, Ross A. W. Slater<sup>1</sup>, Elise K. Lie<sup>1</sup>, Livia Jakob<sup>3</sup>, Andrew Ridout<sup>4</sup>, Noel Gourmelen<sup>3,5</sup>, Bryony I. D. Freer<sup>1,6</sup>, Sally F. Wilson<sup>1</sup>, and Andrew Shepherd<sup>7</sup>

<sup>1</sup>School of Earth and Environment, University of Leeds, United Kingdom

<sup>2</sup>School of Geographical Sciences, University of Bristol, United Kingdom

<sup>3</sup>Earthwave Ltd, Edinburgh, United Kingdom

<sup>4</sup>Department of Earth Sciences, University College London, London, United Kingdom

<sup>5</sup>School of Geosciences, University of Edinburgh, Edinburgh, United Kingdom

<sup>6</sup>British Antarctic Survey, Cambridge, United Kingdom

<sup>7</sup>Department of Geography and Environmental Sciences, Northumbria University, Newcastle upon Tyne, United Kingdom

**Correspondence:** T. Surawy-Stepney (eetss@leeds.ac.uk)

**Abstract.** We observe the evacuation of 11-year old landfast sea ice in the Larsen-B Embayment on the East Antarctic Peninsula in January 2022, which was in part triggered by warm atmospheric conditions and strong offshore winds. This evacuation of sea ice was closely followed by major changes in the calving behaviour and dynamics of the ocean-terminating glaciers in the region. Following a decade of gradual slow-down, satellite measurements show that Hektorica, Green and Crane Glaciers have sped up by approximately 20-50% since February 2022, each increasing in speed by more than 100 m a<sup>-1</sup>. Circumstantially, this is attributable to the loss of floating ice/mélange tongues and their transition into tidewater glaciers. However, a question remains as to whether the landfast sea ice itself could have acted to provide direct buttressing to the glaciers prior to its disintegration. We use diagnostic model simulations to estimate the buttressing effect of the landfast sea ice in the Larsen-B Embayment and its impact on the speed of Hektorica, Green, Evans and Crane Glaciers. The results show that direct sea ice buttressing had a negligible impact on the dynamics of the grounded ice streams. Additionally, our results show that the loss of sea ice buttressing likely produced noticeable changes to the flow speeds of the rheologically weak ice tongues, which could have diminished their stability over time. However, as the accompanying changes in viscous stress were small compared to local spatial variation, this loss of buttressing is likely to have been a secondary process in the disintegration of the ice tongues compared to, for example, increased ocean melting or swell.

## 15 1 Introduction

The Antarctic Ice Sheet lost 2,671 Gt of ice mass between 1992 and 2020 contributing 7.4 mm towards global sea level rise (Otosaka et al., 2023), with almost all of this loss attributed to ocean-driven ice dynamic processes (Slater et al., 2021). The Antarctic Peninsula (AP) is one of the most rapidly changing parts of the Antarctic Ice Sheet due to its exposure to increasing air temperatures relative to a warm baseline (Trusel et al., 2015; Banwell et al., 2021), increased ocean forcing (Smith et al.,

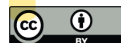

20 2020), decrease in ice shelf area (Cook and Vaughan, 2010), and changes in wind and sea ice conditions (Christie et al., 2022; Fraser et al., 2023).

The Larsen-B Embayment, located on the East AP - bordered by Seal Nunataks in the north and Jason Peninsula in the south - contains 12 major glaciers that flow into the Weddell Sea. Over the last 30 years, satellites have observed major changes in this region. Following a period of relative stability in the 1990's, the collapse of the Larsen-B Ice Shelf in 2002 (Scambos et al., 25 2004) caused an immediate eight-fold increase in speed ( $1.0$  to  $2.8 \text{ km a}^{-1}$ ) on the Jorum, Crane and Hektoría, Green, Evans Glaciers which were previously buttressed by the ice shelf (Rignot et al., 2004). Though continued buttressing by the Larsen-B remnant in Scar Inlet prevented the neighbouring Flask and Leppard Glaciers from speeding up in 2002/3, their ice discharge was 42% higher by 2013 relative to 1995 (Wuite et al., 2015).

Following the ice shelf collapse in 2002, first-year sea ice formed annually during the austral winter in the Larsen-B Em- 30 bayment, however, it remained ice free each year during the summer months. In 2011, the winter sea ice became landfast, and persisted continuously for 11-years (Christie et al., 2022) before it suddenly disintegrated in January 2022 and was evacuated from the embayment (Ochwat et al., 2023). During the weeks and months following the sea ice evacuation, the floating ice/mélange tongues that had developed on the Hektoría/Green/Evans (HGE) glacier system and Crane Glacier disintegrated (Rott et al., 2018), and their tributary glaciers increased in flow speed (Ochwat et al., 2023). There are clear visual parallels 35 between the clearance of sea ice in 2022 and the disintegration of the Larsen-B Ice Shelf 20 years earlier, and the subsequent dynamic responses of these glaciers. However, uncertainty remains about the mechanisms driving the increased ice speeds on HGE and Crane in the latter case, particularly regarding the “buttressing” role that the landfast sea ice was able to provide the glaciers prior to collapse (Sun et al., 2023; Ochwat et al., 2023).

Here, we present observations of the spatial pattern of ice speed change before and after the sea ice disintegration in January 40 2022, along with measurements of glacier calving front location, sea ice extent and thickness amongst others. We then investigate the buttressing capacity of the landfast sea ice using simple diagnostic modelling experiments which aim to quantify the redistribution of stresses as sea ice thickness is changed in the Larsen-B Embayment. Monitoring and understanding the mechanisms driving both long and short-term glacier speed change is important for accurately projecting the future evolution of Antarctic glaciers.

## 45 2 Observations

### 2.1 Sea ice area change

We used multi-spectral optical Landsat-8 imagery to visually identify and delineate the sea ice edge in the Larsen-B Embayment in November each year from 2002 to 2022 (Fig. 1 a, Fig. S1). These observations show that, since its formation in winter 2011, the sea ice was retained throughout the summer months, and generally grew in extent each year through to 2017 when its 50 seaward margin entered a period of fragmentation and regrowth until 2022. Between the 18th and 23rd of January 2022, the multi-year sea ice disintegrated and was evacuated out of the Larsen-B Embayment, leaving open ocean. Satellite data show that there was modest surface melt ponding on the sea ice during the austral summers prior to the sea ice collapse, however,



these melt ponds were more widespread and densely spaced across the entire sea ice area in 2021. Surface melt ponds were observed to be at their maximum extent in December 2021 immediately prior to the sea ice disintegration in January 2022.

## 55 2.2 Ice dynamic and calving response

We applied intensity tracking techniques to Interferometric Wide (IW) mode Sentinel-1a/b Synthetic Aperture Radar (SAR) data, to produce a 7-year record of ice speed over the 12 outlet glaciers in the study region (Hogg et al., 2017; Davison et al., 2023). We report linear trends in ice speed over the domain for the period October 2014 to October 2021 (Fig. 1 d) and October 2021 to April 2023 (Fig. 1 e). Timeseries of mean ice speed were extracted for 1 km-long flowline segments on 12 glaciers  
60 flowing into the Larsen-B Embayment, and a Kalman smoother with an identity transition matrix was used to filter the results (1 a-c) (Wallis et al., 2023). Our velocity measurements show that between October 2014 and January 2022 Hektoria, Green and Crane Glaciers slowed by approximately  $100 \text{ m a}^{-1}$  (Fig. 1 b, d), with smaller decreases in speed on Evans (Fig. 1 c, d), Punchbowl, Jorum and Melville Glaciers (1 b, Fig. S2). Over the same period Flask Glacier sped-up slightly by 5% ( $30 \text{ m a}^{-1}$ ), and the remaining 4 glaciers exhibited fairly stable speeds on annual timescales (1 c, Fig. S2).

We used Landsat-8 and Sentinel-1 images to manually delineate the calving front location of each glacier feeding the  
65 Larsen-B Embayment (Fig. 1 f, Fig. S3). During the period of steady or declining speeds between 2014 and 2021 we observe progressive advance of the calving front on the majority of glaciers in the study region. Hektoria and Crane Glaciers advanced the furthest, with approximately 12 km and 7 km of growth observed between 2015 and 2021 respectively, though this advance was not monotonic. The Larsen-B remnant in Scar Inlet is the only calving front to have continually advanced between 2015  
70 and 2021, growing by 6 km. The remaining glaciers experienced changes in calving front position of 3 km or less between 2014 and 2022.

Following the sea ice disintegration, we observe a large speed-up on Green and Crane Glaciers beginning in February 2022 and accelerating from June/July 2022 (Fig. 1 b, e), followed by a speedup on Hektoria Glacier beginning in July 2022 (Fig. 1  
75 b, e), though this glacier exhibits a more varied signal. At the grounded ice locations chosen for extraction of speed timeseries, we see changes in speed between January and December 2022 of  $35.5 \pm 10.4\%$  on Hektoria Glacier,  $46.9 \pm 7.0\%$  on Green Glacier and  $17.8 \pm 5.5\%$  on Crane Glacier. We also see a sign change in the ice speed trend on Evans and Jorum (Fig. 1 c, e) Glaciers in early 2022 from negative to positive, though the changes in speed are comparable to historical variability in the ice speed data. Speed changes extend up to 10 km upstream of the 2021 grounding line on Hektoria, Green and Crane Glaciers,  
80 where the speed-up is most pronounced. Our velocity measurements show that there was no pronounced change in speed of Leppard, Flask, Starbuck, Pequod, Melville, Mapple or Punchbowl Glaciers discernible from the variability in ice speed over the preceding decade (Fig. 1 c, e, Fig. S2). Overall, the speedup observed after the sea ice disintegration in January 2022 is more extensive than the region of slowdown observed between 2015 and 2022 (Fig. 1 d), and extends inland onto the grounded ice sheet (Fig. 1 e), therefore increasing the rate of ice discharge into the ocean.

85 The large dynamic changes on Crane and Green Glaciers were preceded immediately by a period of terminus retreat in February 2022 of 6 km and 12 km on the Crane and HGE Ice Shelves respectively (Fig. 1 f). Crane Ice Shelf continued

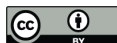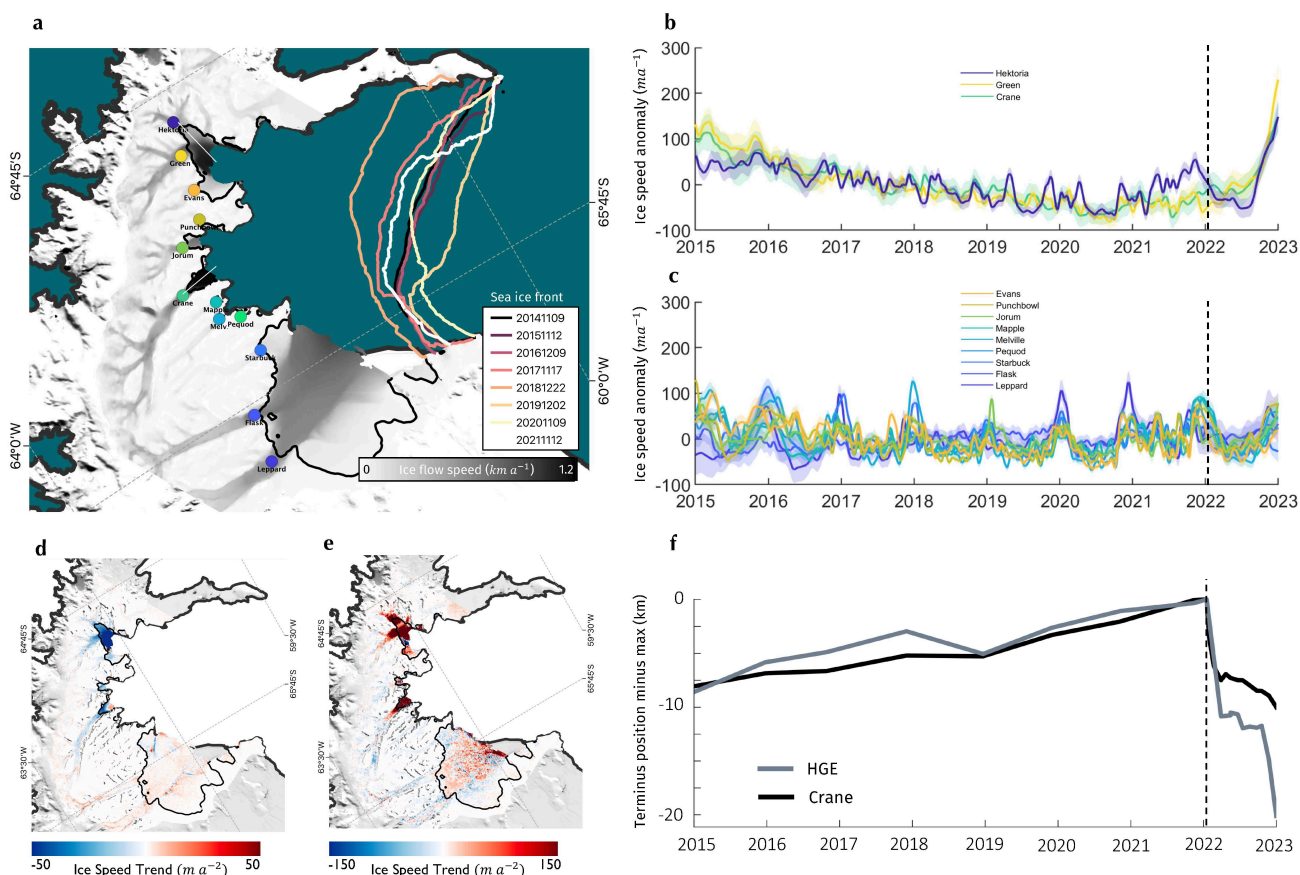

**Figure 1.** Ice Speed and speed change map of the Larsen-B Glaciers. a) Inverse-error-weighted mean ice speed of glaciers flowing into the Larsen-B Embayment on the East Antarctic Peninsula, measured between October 2014 and April 2023 using Interferometric Wide (IW) mode synthetic Aperture Radar (SAR) data acquired by the Sentinel-1a/b satellites (greyscale map). Grounding line location (constituting that of Wallis et al. (In Prep.) in HGE and Crane, and the MEASURE InSAR-derived grounding line elsewhere (Mouginot et al., 2017)) is shown with the solid black line. The locations at which ice speed timeseries (b-c) were extracted on Hektoria, Green, Evans, Punchbowl, Jorum, Crane, Mapple, Melville, Pequod, Starbuck, Flask and Leppard Glaciers are shown with coloured circles. Coloured lines show the sea ice fronts, measured annually between November 2014 and November 2021. b) Ice speed anomaly (signal minus the timeseries mean) from January 2015 to January 2023 on Hektoria, Green and Crane Glaciers. c) Ice speed anomaly on the other glaciers shown in (a). For the plots in (b-c), data was extracted over 1 km long segments of flowlines with centrepoinets shown by the circles in (a) and a Kalman smoother was used along with a 30-day moving average to smooth the data. The uncertainties shown are  $1\sigma$  either side of the mean. d) A map of the observed rate of change in ice speed between October 2015 and October 2021, prior to the sea ice disintegration event. e) A map of the observed rate of change in ice speed between October 2021 and April 2023, spanning the sea ice disintegration event in February 2022. f) Timeseries of distance to the calving front from a point on Hektoria Glacier (grey line) and Crane Glacier (black line) from January 2015 to January 2023. These distances are measured along the white lines shown in (a). Datapoints are annual between 2015 and 2022, and monthly thereafter. Black dashed lines in panels (b, c, f) show the 18th January 2022, the start of the break up of the landfast sea ice in the Larsen-B Embayment.

to calve during the period of acceleration and, by the end of our study period, had retreated 12 km relative to its maximum



position in Dec 2022. Hektoria and Green Glaciers were further exposed, and their ice shelves decoupled, by a further retreat of the HGE Ice Shelf by 9 km between September and December 2022.

### 90 3 Sea ice buttressing

The observations of the Larsen-B Embayment presented in this study and others (Ochwat et al., 2023) suggest that landfast sea ice permitted the growth of the floating ice/mélange tongues in front of HGE and Crane Glaciers over the period 2011 to 2022, which acted as a control on the upstream glacier dynamics. However, it is unclear the extent to which the sea ice could have itself acted to buttress the upstream glaciers, and whether the growth of the ice tongues is attributable to the buttressing effect of sea ice as opposed to other mechanisms by which sea ice can confer stability to regions of ice mélange.

Recent observational reports of the January 2022 evacuation of sea ice from the Larsen-B Embayment provide conflicting accounts of the possible buttressing effect sea ice could have had. Ochwat et al. (2023) suggest that the growth of the ice tongues during the residency of the sea ice, the potential dampening by the sea ice of ice speed in Scar Inlet and the immediate speed up of certain ice tongues following the collapse of the sea ice is evidence of its buttressing effect. However, Sun et al. (2023) suggest that the limited immediate response of the glaciers to the sea ice evacuation, and the potential plastic rheological response of the sea ice to sudden changes in upstream stress are reason to believe sea ice buttressing was minimal.

In the context of ice shelves, “buttressing” refers to the hypothetical difference in englacial stress with and without the ice shelf (Gudmundsson, 2013; Fürst et al., 2016). To be consistent, we take “buttressing” to have the same meaning in the context of sea ice. Consequently, there are two ways that a loss of sea ice buttressing could have contributed to the observed speed changes on the HGE and Crane Glaciers: 1) directly influencing the stress state of the grounded ice such that the increases in speed after January 2022 cannot be fully accounted for by the loss of the ice tongues or other external influences, and 2) reducing longitudinal stresses in the ice tongues, contributing to their stability over the time the sea ice was present and indirectly controlling the upstream glacier speed. This latter possibility is to be contrasted with other non-buttressing effects that influence the stability of the ice tongues, such as the capacity of sea ice to bond fragments of mélange together, prevent small calving events at the glacier terminus and the export of icebergs, and to dampen swell-induced loading cycles.

Here, we use the BISICLES ice sheet model (Cornford et al., 2013) to directly investigate these possible effects for the glaciers that exhibited the most pronounced changes in dynamic behaviour after January 2022 – namely the HGE system of glaciers and Crane Glacier.

#### 3.1 Model set-up

Initially, we set up a model domain with geometry approximately reflecting the HGE and Crane basins of the Larsen-B Embayment, using a combination of smoothed bedrock elevations according to Huss and Farinotti (2014), surface elevations from the Reference Elevation Model of Antarctica (REMA) digital elevation model (Howat et al., 2019) which is timestamped to May





120 2015, and grounding line positions timestamped for the year 2021 (Wallis et al., In Prep.). Contemporary grounding line loca-  
tions are required as there has been significant grounding line retreat on these glaciers since the MEASURES InSAR grounding  
line datasets were produced (Wallis et al., In Prep.). We performed an inversion for basal traction ( $C$ ) and enhancement factor  
( $\phi$ ) fields using mean observed ice speed across the HGE and Crane basins in 2021 (Cornford et al., 2015). At this point we  
do not include sea ice in the model geometry, so the glaciers terminate in open sea. As this inverse problem is ill-posed, we  
125 use regularisation with a Tikhonov operator that approximates the gradients of the control fields to ensure the problem is not  
underdetermined and improve its conditioning. L-curve analysis (Hansen, 1994) was used to select an appropriate level of  
regularisation (Fig. A1). We note that, as the thickness and bedrock data in this region of Antarctica is very poorly constrained,  
the geometry we construct should be considered plausible as opposed to fully accurate. As such, our conclusions are subject  
to change under replication using different glacier geometries. Given the potential influence of unknown deviations in the real  
130 geometry from the data available to us, we avoid performing transient simulations, which risk amplifying the impact of these  
uncertainties.

To simulate the effect of the landfast sea ice in the embayment, we assume that it can be treated as a thin ice shelf with the same  
constitutive ice rheology as the upstream glaciers. Considering a range of length- and time-scales, sea ice is typically treated  
as a visco-plastic (Hibler, 1979) or elasto-visco-plastic material (Hunke and Dukowicz, 1997). This captures a material that is  
135 strong in compression and weak in extension and shear in which long-term viscous internal creep deformation is coupled with  
an elastic response to sudden loading and plastic deformation in thin-ice-covered leads. Regarding the sea ice that inhabited the  
Larsen-B Embayment prior to 2022, satellite images show a fairly uniform, unbroken ice coverage with a smooth deformation  
field not confined to leads (Fig. S5). This suggests incompressible flow with stress continuity between the sea ice edge and the  
glacier calving fronts, and largely viscous or elastic deformation over its decade of residency, though indications of a plastic  
140 response to sudden loading have been observed (Sun et al., 2023).

In turn, any viscous deformation is controlled by a rheology which depends on the relative abundances of meteoric and  
congelation ice, with differences in crystal structure and the presence of brine-inclusion leading to a lower effective viscosity  
in the latter case. Similarly, surface melt-induced porosity in the meteoric ice lower its effective viscosity relative to glacier ice.  
The use of the same formula for the effective viscosity of land and sea ice, along with the assumption of viscous deformation,  
145 means that our treatment is to likely provide an upper bound to the buttressing strength that unbroken landfast sea ice could  
exert on the upstream glaciers.

After setting up the model domain in the way described above, we add such an ‘ice shelf’ between the glacier calving fronts  
and the observed seaward limit of the multi-year landfast ice (Fig. 2 a). We then recalculate ice speed over the domain by  
150 solving the stress-balance equations in this new configuration, and compare with the speed in the absence of the sea ice-like  
shelf (Fig. 2 b-d). For these simulations, we use a regularised-Coulomb sliding law (Schoof, 2005; Joughin et al., 2019) with  
a threshold ice speed of  $u_o = 300 \text{ m a}^{-1}$ , ensuring basal stresses on much of the grounded ice remain relatively unchanged as  
sea ice is introduced. Our choice of  $u_o = 300 \text{ m a}^{-1}$  is based on the speeds of tributary glaciers flowing into HGE and Crane  
Glaciers, though a choice of an even lower threshold makes little difference to the main results (Sec. A3). This was carried out



155 for sea ice thicknesses of 1 m, 2 m, 5 m and from 10 m to 50 m in increments of 10 m – a range that extends beyond what one might expect to be realistic sea ice thicknesses in the study region. CryoSat-2 radar altimetry observations show the sea ice had a mean freeboard under 1 m over the period 2013 to 2020 (Fig. S5), implying an approximate sea ice thickness under 10 m. We choose to model the sea ice as uniform in thickness, despite these data suggesting otherwise, as the data do not extend to the critical zone at the glacier calving front. This should do little to change the conclusions of the modelling results. The sea  
160 ice was assumed to be of vertically and horizontally uniform temperature of  $-5^{\circ}\text{C}$ . Again, this might lead to stiffer ice than in reality as observations of surface melt (Ochwat et al., 2023) indicate that the sea ice might be better modelled as temperate.

## 3.2 Modelling results

### 3.2.1 Direct buttressing of grounded glaciers

Transects located approximately along flowlines of four glaciers that accelerated in 2022 show that speeds change smoothly  
165 along the glaciers when sea ice is added into the embayment (Fig. 2 b-d). However, these changes in speed are strongly attenuated upstream of the calving front. At the grounded-ice locations used to produce the timeseries in Fig. 1 b, we see instantaneous ice speed changes on the order of 0-1% with the addition of a realistic upper limit of 10 m thick sea ice, and a speed change of 0-6% with the highly unlikely sea ice thickness of 50 m (Fig. 2 b, c, d). This is considerably below the 15-50% speed change observed on these glaciers (Fig 1 b) after January 2022. This is to be contrasted with the much larger 2 – 5% changes in speed  
170 seen at the calving fronts and on the floating ice tongues in the simulations with sea ice thickness of 10 m (Fig. 2 b, c). These modelled percentage changes in speed are similar in magnitude on all glaciers including Evans, where we do not observe a substantial dynamic response (Fig. 1 g). This indicates in its own right that sea ice removal was not the primary cause of the ice dynamic change observed on these glaciers.

175 In the range 0 – 50 m, the addition of ice in the Larsen-B Embayment produces changes in speed that vary approximately linearly with thickness (Fig. 2 d). Using the adjoint to the linearised stress balance equations, we can directly compare the magnitudes of gradients in ice speed with respect to ice thickness across the whole domain (Sec. A2). This gives us intuition as to where changes in ice geometry that occurred in 2022 might have led to changes in glacier speed. We treat ice enhancement factor ( $\phi$ ) as a proxy for ice thickness ( $h$ ) as, to first order, perturbations to these quantities each have the same effect on  
180 vertically-integrated effective viscosity. To ensure that we are not aliasing an atypical part of the solution space, we find these sensitivities for 6 realisations of the control variables  $C$  and  $\phi$  corresponding to solutions of the inverse problem with different amounts of regularisation. Fig. 3 shows magnitudes of gradients of ice speed at two locations (Fig. 3 a), with respect to effective thickness, assuming 10 m of sea ice.

Though Fig. 2 shows that changes in sea ice thickness result in non-zero changes to ice speed along the whole glacier length,  
185 we now see that the sensitivity of grounded ice speed to changes in effective sea ice thickness is dwarfed in comparison to changes in the effective thickness of glacier ice. This can be seen especially clearly in transects taken along shear margins of Hektoria/Crane Glaciers and out into the sea ice (Fig 3 b.1, b.2). The map of logarithmic sensitivity (Fig 3 a) shows the sea

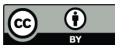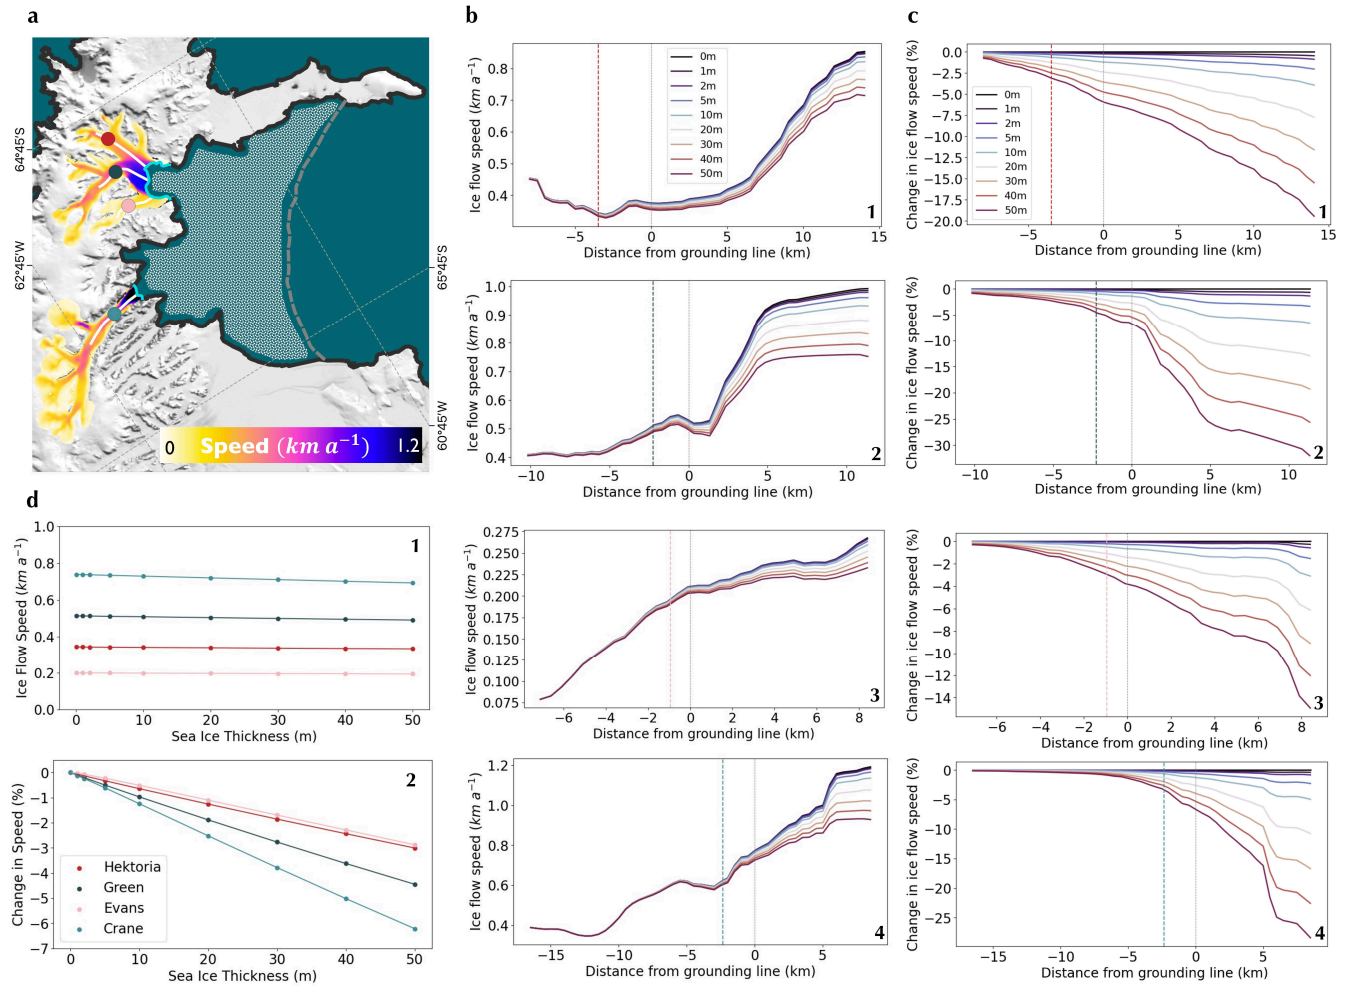

**Figure 2.** Modelled changes in speed with varying sea ice thickness. (a) The Larsen-B Embayment. Flow speeds following the inversions for enhancement factor and basal slip coefficient fields over the Hektoria and Crane basins. The patterned area bound by the embayment walls and the grey dashed line shows the maximum extent of the landfast sea ice – where sea ice was added during the simulations. Coloured circles on the glaciers show where timeseries of speed were extracted in Fig. 1. Flowlines used to extract speeds for different sea ice thicknesses (d) are shown in white. Cyan lines show the glacier terminus positions according to the model geometry and the basemap is the MODIS Mosaic of Antarctica (Haran et al., 2021). (b) Modelled ice speeds for different sea ice thicknesses, where dark blue indicates 0 m and dark red indicates 50 m sea ice thickness, along the flowlines shown in (a): Hektoria (b.1), Green (b.2), Evans (b.3) and Crane (b.4). Thin, vertical, grey dashed lines show the positions of the grounding lines, and coloured vertical lines show the positions of the corresponding circles in (a). (c) A repeat of (b) with percentage speed changes relative to zero sea ice shown instead of speed. (d) Ice speed (e.1) and percentage ice speed change (e.2) for different sea ice thicknesses at the locations with corresponding colour shown in (a).

ice in the glacier embayments to have an impact on the grounded ice, though this diminishes quickly further out to sea. These results further suggest that direct sea ice buttressing of the parts of the glaciers that showed speed increase in 2022 is likely to have been negligible.



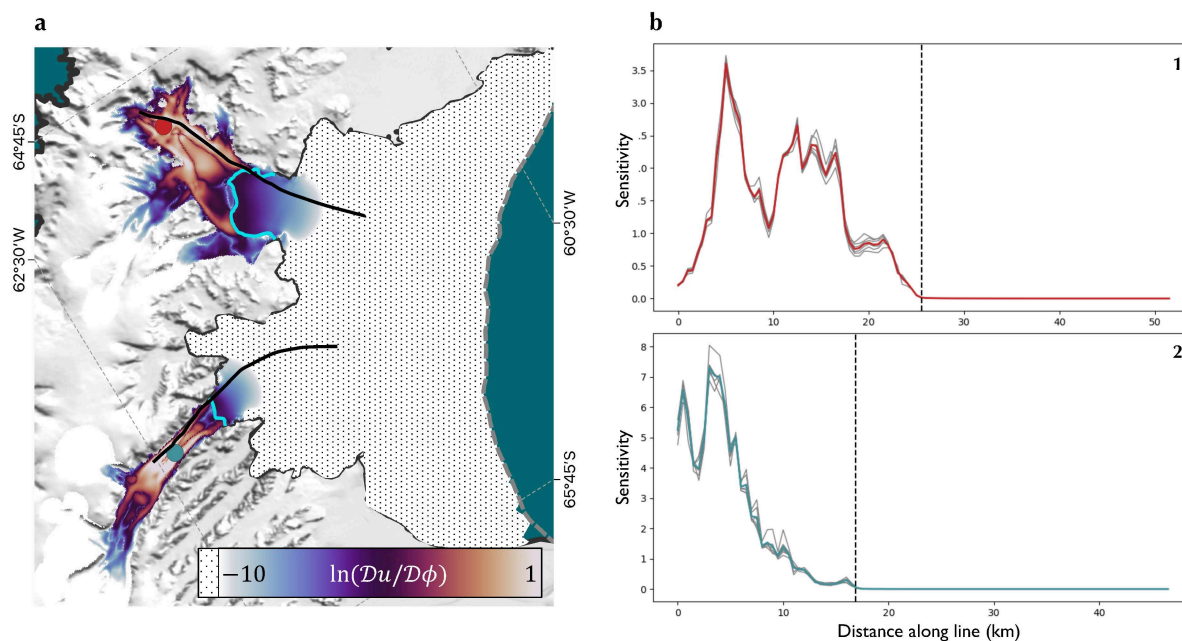

**Figure 3.** Sensitivity of ice speed to changes in effective ice thickness. (a) Magnitudes of differential sensitivities of ice speed in the locations marked by the coloured circles to change in enhancement factor across the domain. The black spotted area shows where the sensitivity is under  $e^{-10}$ . Cyan lines show the boundaries between the glacier termini and the start of the artificial landfast sea ice according to the model geometry. Black lines show where transects of data were collected to produce the graphs in (b). The basemap is the MODIS Mosaic of Antarctica (Haran et al., 2021). (b) Magnitudes of sensitivities along the transects shown in (a). Black dashed lines show the location along the transect of the glacier terminus: Hektoria (b.1) and Crane (b.2). Grey lines indicate the different realisations of the control variables  $C$  and  $\phi$ , while coloured lines show the mean sensitivities. Note: data is presented logarithmically in (a) and linearly in (b).

### 3.2.2 Buttressing of the floating ice tongues

To examine the component of ice tongue stability due to the buttressing of sea ice, we first consider how strain rates near the glacier termini change with the addition of 10 m thick sea ice to the embayment (Fig. 4). Despite the fact that speeds in these regions change by a mean of under 4% except very close to the calving fronts (Fig. 2 c), principal strain rates increase by  
 195 between 5% and 10% across large parts of the HGE and Crane Ice Shelves (Fig. 4 a), with increases of 15% concentrated 2.5 km and 3.5 km inland of the HGE and Crane calving fronts respectively. Together with Fig. 2 b and c, this indicates that the buttressing effect of 10 m of sea ice in the embayment is enough to produce a noticeable dynamic response on the weak floating ice. The important question for the Larsen-B glacier system that remains is whether this change could have destabilised the floating ice tongues of HGE and Crane Glaciers.

200 The simulations exhibit a smooth redistribution of stress when the sea ice is added, however this is unrealistic for the case of an ice tongue formed of ice mélange where thicknesses can vary considerably from place to place. Stress continuity instead concentrates stress in the thinner areas. It is possible that small changes in the vertically-integrated stress would surpass the load-bearing capacity of these thinner sections of ice, causing the ice tongue to break up. To assess how plausible this is, we

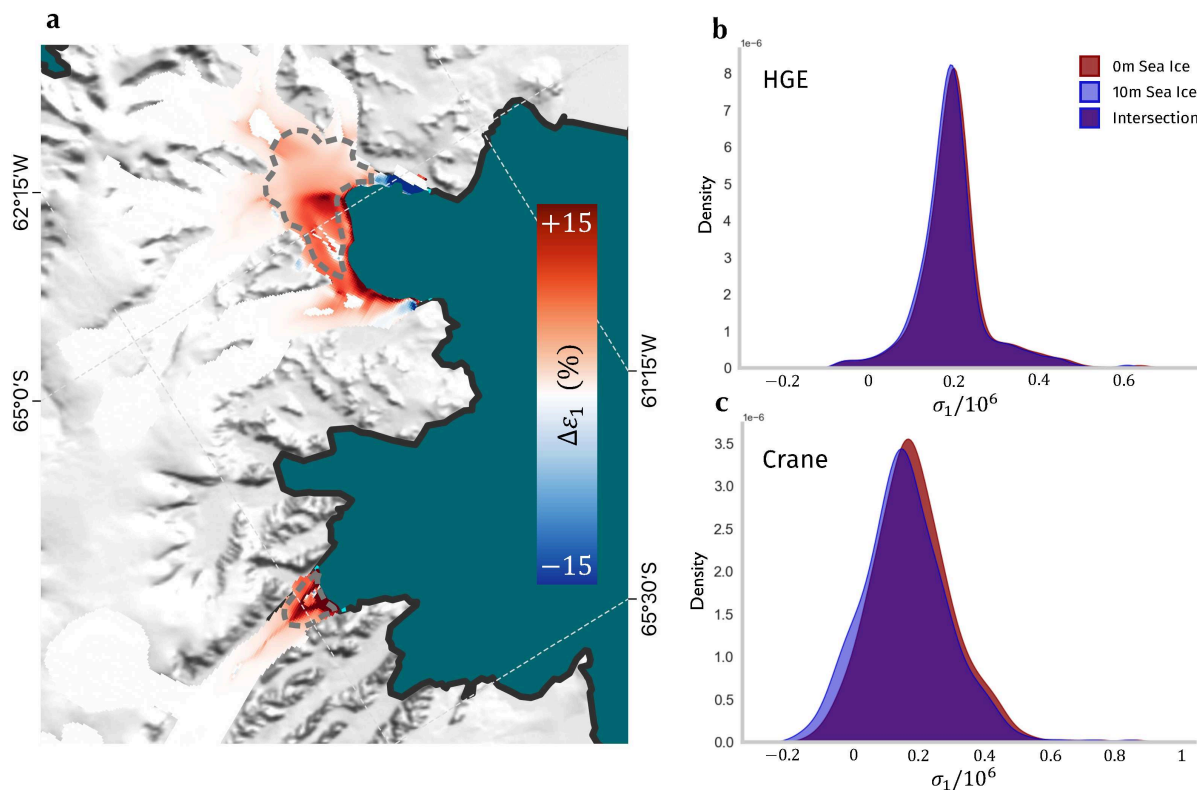

**Figure 4.** Change in the modelled strain rates and stresses in response to the addition of 10 m thick sea ice. (a) Percentage change in principal strain rate when sea ice is added at 10 m compared with no sea ice. (b) Histograms of principal stress for 10 m thick sea ice (blue) compared with no sea ice (red) and their overlap (purple). These graphs are produced for the floating ice regions bounded with the grey dashed lines in (a): HGE (b.1) and Crane (b.2) Glaciers.

compare the distributions of vertically-averaged principal viscous stresses across the ice shelves with and without 10 m thick  
205 sea ice (Fig. 4 b). We see on both HGE and Crane Glaciers that the addition of the sea ice reduces the mean principal stress,  
however this change is small compared to the variance of stresses within the ice shelves. Assuming that weaknesses in the ice  
shelves are not spatially concentrated, it is improbable, therefore, that the ice tongues were stable prior to the sea ice removal  
and that the sea ice removal caused a large enough perturbation in viscous stress to account for the spatially extensive ice shelf  
break-up that was observed.

210

The above analysis relates to instantaneous changes in the stresses and strain rates within the floating ice that result from a  
loss of sea ice buttressing. We have suggested that the distributions of principal stresses within the floating ice change, but by an  
amount that is unlikely to have led to the rapid collapse of the ice shelves such as seen on the Crane and HGE Glaciers. However,  
changes in strain rate (Fig. 4 a) can have implications for ice shelf stability on longer timescales. For example, increased ice  
215 shelf thinning rates, resulting from enhanced velocity gradients, can lessen its robustness to fracturing. Additionally, elevated



strain rates can lead to faster changes to the glacier geometry. We cannot rule out the hypothesis that such processes were involved in the latter calving events on Crane Glacier and those on HGE starting in September 2022, though it seems likely that the effect would have been more due to the preceding loss of seaward sections of the ice tongues as opposed to this initial loss of sea ice buttressing.

## 220 4 Discussion

Given the abundance of landfast sea ice fringing the fast-flowing margin of the Antarctic Ice Sheet (Fraser et al., 2021), and the potentially large contribution of ice dynamics to future changes in Antarctic mass balance (Joughin and Alley, 2011; Pattyn and Morlighem, 2020), understanding how changes in landfast sea ice extent and thickness alters the dynamic behaviour of glaciers is evidently valuable. The sudden evacuation of the sea ice from the Larsen-B Embayment, and the changes in  
225 dynamics of HGE and Crane Glaciers that followed, has provided us with a natural opportunity investigate these relationships. The concurrency of the evacuation of the sea ice and the observed changes in calving behaviour and dynamics of the upstream glaciers demonstrates the crucial impact of sea ice in the region, however our modelling results suggest that the component of this due to buttressing, as it is understood in the context of ice shelves, is likely to have been minimal.

### 4.1 What impact does sea ice have on glacier ice?

230 Landfast sea ice allows ice shelves to grow initially by providing a barrier to icebergs that, having calved from the glacier terminus, would otherwise drift away. Sea ice formation between these icebergs can bond them together, and to the glacier calving front, forming a rigid ice mélange with material properties determined by the size and density of the icebergs, and the strength of the sea ice bonds. These tongues can get progressively more robust over time as icebergs calving upstream are more tightly constrained and sea ice thickens. It is evident, therefore, that landfast sea ice in an embayment can stabilise ice tongues  
235 through the twin mechanisms of inhibiting the export of floating icebergs and increasing the strength of bonds between them. If this landfast sea ice disintegrates, the visible calving of mélange at the seaward end of the ice tongue will increase through the first mechanism and, if ocean or atmospheric conditions led to the break-up of sea ice within the ice tongue itself, some level of fragmentation of the mélange would also be expected. This is perhaps the mechanism responsible for the partial fragmentation of the Crane and HGE ice tongues concurrently with the sea ice evacuation, which led to the speed-up of Crane and Green  
240 Glaciers.

Additionally, and perhaps more importantly for the additional calving events seen on the Crane Ice Shelf in the months following the sea ice evacuation, and those on Hektor and Green Glaciers in September 2022, sea ice can act to attenuate ocean swell that originates outside of the embayment (e.g. Voermans et al. (2021)). This occurs through scattering of ocean waves from heterogeneities in the ice cover, and the dissipation of wave energy, for example by the elastic plate-bending of  
245 the sea ice at different lengthscales and the short wavelength fracturing of ice near its margin (Squire, 2020). Without the sea ice, ocean swells cause higher-amplitude flexural loading cycles that can lead to brittle failure (Holdsworth and Glynn, 1978; Massom et al., 2018).

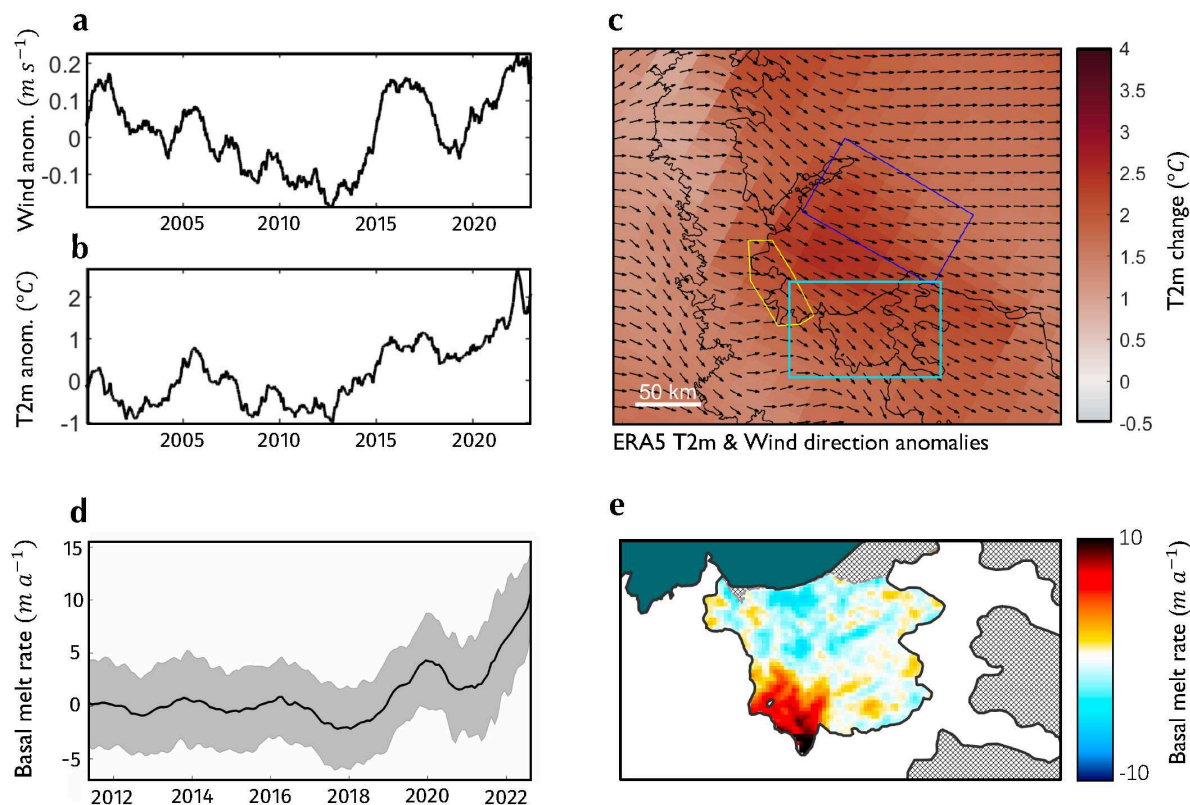

**Figure 5.** Environmental forcing over the Larsen-B Embayment. (a-c) Wind velocity and air temperature data over the period 2000-2022. (a) 2022 wind speed anomaly (signal compared to timeseries mean) extracted from the purple box shown in (c). (b) 2 m air temperature anomaly extracted from the yellow box shown in (c). (c) Normalised wind direction anomaly (vector field) and 2 m air temperature anomaly (colour) over the Larsen-B Embayment in 2022 compared to the 2000-2022 mean. (d-e) CryoSat-2 swath-mode ice shelf basal melt rate observations from November 2010 to January 2022 over Scar Inlet in the Larsen-B Embayment. (d) Timeseries of mean monthly basal melt rate in Scar Inlet (indicated with a blue box in (c)). (e) Mean basal melt rate over the Scar Inlet (shown by the blue box in (c)) between November 2010 and January 2022.

## 4.2 Environmental drivers

To examine the climatic factors that may have played a part in the 2022 sea ice fragmentation and the subsequent dynamic response of the glaciers, we looked at air temperature, wind speed and basal melt-rate data over the Larsen-B Embayment. ERA-5 reanalysis data suggests that annual mean surface air temperatures over the 11 years of landfast ice persistence had been steadily increasing at a rate of  $0.25^{\circ}C a^{-1}$  over the Vaughan and Exasperation Inlets (Fig. 5 b). By 2022, the air temperature had increased to  $2^{\circ}C$  above the 2000-2022 mean in the Larsen-B Embayment. ERA-5 temperature data shows an even more pronounced localised peak in the air temperature anomaly over the Larsen-B Embayment in the months prior to the sea ice disintegration, indicating that this increase in air temperature led to extensive surface meltwater ponding on the sea ice in the embayment in 2022, beyond that observed in previous years. These observations indicate that the sea ice in the



Larsen-B Embayment was simply unable to persist through a longer and more intense melt season, brought about by trends in atmospheric conditions, than it had encountered in previous years.

260 Additionally, ERA-5 wind velocity data suggest there were anomalously strong north-westerlies over the Antarctic Peninsula in 2022 compared to the 2000-2022 mean (Fig 5 c). These strong offshore winds would have aided the evacuation of the sea ice from the embayment following its disintegration, before it could re-freeze as pack-ice.

265 **Observations** of ice shelf basal melt rates produced over Scar Inlet, the last remaining remnant of the original Larsen-B Ice Shelf, from swath mode CryoSat-2 radar altimetry data acquired between November 2010 and January 2022 (Gourmelen et al., 2017), show that spatially the highest melt rates are located at the grounding line (Fig. 5 d). **A timeseries of the mean basal melt rate from this region shows** that the rates were fairly constant at  $0 \text{ m a}^{-1}$  for the majority of the period from 2010 to 2018, however, after 2018 there was an increase in the basal melt rate with a further pronounced increase from around  $2 \text{ m a}^{-1}$  in January 2021 to around  $10 \text{ m a}^{-1}$  in January 2023 (Fig. 5 e). While there is an absence of direct ocean temperature measurements during the period around 2021, it is possible that the strong offshore winds shown by the ERA5 data (Fig. 5 a) 270 drove an upwelling in ocean circulation bringing warm water up from depth, in addition to blowing out the disintegrated sea ice. If this proxy is representative of changes in ocean temperature across the Larsen-B Embayment then it strongly indicates that widespread increased grounding line ablation also had an important role to play in the rapid calving of the floating ice tongues and ice dynamic response of HGE and Crane Glaciers, in addition to the removal of the consolidating effect that the sea ice provided. It is also plausible that the mélange adjacent to HGE was exposed to these higher melt rates, which may have 275 contributed to its disaggregation in 2022. While the basal melt rates observed on Scar Inlet since 2020 of up to  $10 \text{ m a}^{-1}$  (Fig. 5 d) have not yet caused a notable speedup on Flask and Leppard Glaciers, which may be in part explained because they remain buttressed by the laterally constrained ice shelf remnant, these basal melt rates are comparable to those observed on ice streams flowing into the Amundsen Sea Sector of West Antarctica (Shean et al., 2019). If sustained or even increased in the future, these basal melt rates may suggest that a dynamic response on these glaciers could be expected in the longer-term. The role of 280 changing ocean conditions is known to have an impact on the ice dynamic response of the Antarctic Ice Sheet, therefore, this study further demonstrates the importance of acquiring long-term, continuous, multi-year ocean temperature measurements to assess the impact of this processes.

### 4.3 Wider implications of sea ice on glaciers

285 The results presented here are relevant to a certain limit of landfast sea ice and glacier conditions. Namely: i) the landfast sea ice existed in a relatively enclosed embayment, ii) it was likely to have been relatively thick due to its multi-year persistence over the previous 11-years in a relatively cold ocean, iii) it appeared spatially coherent and deformed smoothly and iv) the inflowing ice shelves were rheologically weak. How well the specific results generalise depends on how well these variables apply to the situation under consideration. However, the conclusion that sea ice has limited capacity to directly buttress glaciers 290 is likely to hold in general for unbroken, landfast sea ice as the conditions explored here are consistent with a 'maximum but-





295 tressing' example. The exception is in the rheology of the ice shelves, where stiffer ice may be more capable of transmitting stress upstream. Additionally, the assumption of stress continuity within the sea ice does not hold for all sea ice conditions, for example for pack ice or landfast sea ice with large fractures. In such cases, for example, short period stress transfers and elastic response of ice floes could lead to greater buttressing. Such a situation has been investigated, for example by Robel (2017), in the context of fjord-like geometries.

300 In recent decades, the general picture of Antarctic sea ice has been one of regional fluctuation and relative continental stability, with sea ice extent (SIE) increasing slightly between the early 1970s and the mid 2010s (Turner et al., 2022). 2014 saw the beginning of a fall in SIE, culminating in a record Antarctic sea ice low in 2022 (Turner et al., 2022), which already looks set to be exceeded by even lower sea ice extent in 2023. Several studies have indicated the importance of sea ice in maintaining glacier stability in Antarctica and Greenland (Arthur et al., 2021; Christoffersen et al., 2012), and the results of this study do little to suggest otherwise. However, to more accurately judge the extent to which sea ice stabilises ice shelves, a greater understanding of the mechanisms by which this happens is required. To help with observational and modelling studies that aim to do this, work should be carried out to close the gaps in sea ice extent, sea ice concentration, and altimetry measurements at the critical zone near glacier calving fronts.

#### 4.4 Limitations and future work

310 As discussed above, our treatment of sea ice in this study is necessarily simplified. We argue that the results represent an upper bound on the buttressing capacity of the ice assuming viscous rheology, however, this may not be the case. For a one-dimensional ice stream/shelf, assuming stress continuity, the solution to the stress balance is unique given a lateral boundary condition. Hence, the specification of a particular constitutive relation has no impact on the stress distribution and a plot like Fig. 4 b would be unchanged. Fig. 3 a suggests that the sea ice in front of the centre of the ice shelf, where the flow is close to one-dimensional, has greatest impact on upstream flow. This indicates that the prescribed constitutive relation, whether viscous, elastic or plastic might alter the results of the experiments less than expected. However, future work should look to determine the deviation in stress solutions given different constitutive relations in a full two- or three-dimensional setting. Smooth deformation fields over the landfast sea ice suggest that stress continuity is a good assumption (Fig. S5). However, if stresses in the sea ice are not continuous, e.g. if chocking of sea ice floes were a major component of its movement, it is possible that the buttressing capacity of the ice could exceed that predicted in this study.

320 The sensitivities presented in Fig. 3 are reported for a number of realisations of the control fields  $C$  and  $\phi$ . This is because, by looking at solutions corresponding to different amounts of regularisation, we hope to show that the spatial pattern of ice speed sensitivities is typical for solutions near the misfit minimum. A more complete picture of the sensitivities might be obtained in future by looking at the curvature of ice speed around the solution, i.e. the principal components of the Hessian matrix. At present, such analysis is difficult to achieve in BISICLES, but is possible for models employing automatic differentiation (e.g. Recinos et al. (2023)). Additionally, this would enable a more exact computation of the gradient, rather than the linear



325 approximations used here (Goldberg and Sergienko, 2011).

Additional observations will help to further our understanding of the relative importance of the components of the effect of sea ice on the stability of floating glacier ice. We see in the sensitivity maps (Fig. 3) a focussing of the effect of sea ice thickness close to the glacier termini (Fig. 2 a). This suggests that the buttressing component of the effect of sea ice on the glacier tongues was concentrated in the small embayments local to the glaciers. This is in contrast to the component due to the attenuation of ocean swell which relies on the full extent of sea ice in the embayment and beyond (Ochwat et al., 2023). Future observations of sea ice growth in the small embayments, e.g. seasonally, vs the Larsen-B Embayment as a whole, and the impacts on the calving behaviour of Hektoria and Crane Glaciers can help shed more light on the relative importance of these processes on the growth of mélange tongues.

## 335 5 Conclusions

Our results show that multi-year landfast sea ice which has been present in the Larsen-B Embayment for the last 11-years, following the catastrophic collapse of the Larsen-B Ice Shelf in 2002, completely disintegrated between the 18th and 23rd of January 2022. This was followed in February with the onset of major ice dynamic speedup events and changes in the calving behaviour of glaciers flowing into the Larsen-B Embayment. Hektoria, Green and Crane Glaciers have sped up by approximately 15-50% since February 2022 and, with the most pronounced increase of approximately  $240 \text{ m a}^{-1}$  on Green Glacier upstream of the grounding line. These glaciers lost the majority of their floating ice shelves, that had built up over the preceding decade, by the end of 2022, with the largest retreats of 12 km and 6 km on HGE and Crane Glaciers immediately following the loss of the landfast sea ice.

Model simulations suggest that the increases in speed on the now tidewater parts of Hektoria, Green and Crane Glaciers are not due to the loss of direct mechanical buttressing supplied by the sea ice that formerly covered the Larsen-B Embayment. However, that sea ice undoubtedly had an effect on the floating parts of these glacier systems. This effect can be partitioned into the bonding of mélange by sea ice in the ice tongues, the dampening of ocean swell that would otherwise cause high amplitude stress cycles in the ice tongues and the buttressing that reduces longitudinal internal stresses. The modelling and observations presented here suggest that direct buttressing of the sea ice could have been large enough to have had a dynamic impact on the floating ice, but that the disintegration of the ice shelves is unlikely to have been related to the associated small changes in viscous stress. This leads us to suggest that the term “buttressing” should not be used in the context of sea ice in the way it is understood when applied to ice shelves. However, a full visco-elastic model of the glaciers, mélange tongues and sea ice is required to fully quantify the relative importance of the effects of sea ice on floating glacier termini, along with further observations of sea ice/ice shelf interactions in the Larsen-B Embayment and elsewhere.

355 *Code availability.* The BISICLES Ice Sheet Model is open source and the code is available at: <https://commons.lbl.gov/display/bisicles/BISICLES>.



*Data availability.* It is the authors' intention that the published version of this manuscript be accompanied by the following datasets used in this study: calving front and sea ice front positions, the mean speed and speed trend maps shown in Fig. 1, timeseries of ice speed shown in Fig. S2, freeboard and associated uncertainty point data shown in Fig. S5, maps of thickness and bed topography used in the model simulations, basal melt rates over the Scar Inlet, and shapefiles used for the extraction of speed, modelled speed and sensitivity data.

360 *Author contributions.* AEH and TSS designed the work and wrote the manuscript. TSS led the modelling with contributions from SLC and AEH. AEH led the observations with contributions from the remaining authors. BJD processed ice speed data, analysed the ice speed data along with RAWS and SFW, analysed the atmospheric reanalysis data and wrote the manuscript. BJW analysed the speed data and processed and provided grounding line locations. HLS and EKL provided calving front locations and fast sea ice extents. BIDF processed and analysed altimetry data across the glaciers. AR processed CryoSat-2 altimetry data, along with AS. LJ and NG produced and basal melt-rate data over  
365 the Scar Inlet. All authors contributed to the scientific discussion, interpretation of results and writing of the manuscript.

*Competing interests.* The authors declare that they have no conflict of interest.

*Acknowledgements.* The authors gratefully acknowledge the European Space Agency (ESA) for the acquisition of CryoSat-2 data and ESA and the European Commission for the acquisition and availability of Copernicus Sentinel-1 data. Funding is provided by ESA via the ESA Polar+ Ice Shelves project (ESA-IPL-POE-EF-cb-LE-2019-834) to AEH, BJD, NG, and LJ, the SO-ICE project (ESA AO/1-10461/20/I-NB)  
370 to AEH, BJD, NG and LJ, which both are part of the ESA Polar Science Cluster, and the CryoTEMPO EOLIS project (4000128095/19/I-DT) to NG and LJ. Funding is provided from NERC via the DeCAdeS project (NE/T012757/1) and the UK EO Climate Information Service (NE/X019071/1) to AEH and BJD.



## References

- Arthur, J. F., Stokes, C. R., Jamieson, S. S. R., Miles, B. W. J., Carr, J. R., and Leeson, A. A.: The triggers of the disaggregation of Voyeykov Ice Shelf (2007), Wilkes Land, East Antarctica, and its subsequent evolution, *Journal of Glaciology*, 67, 933–951, <https://doi.org/10.1017/jog.2021.45>, 2021.
- Banwell, A. F., Datta, R. T., Dell, R. L., Moussavi, M., Brucker, L., Picard, G., Shuman, C. A., and Stevens, L. A.: The 32-year record-high surface melt in 2019/2020 on the northern George VI Ice Shelf, Antarctic Peninsula, *The Cryosphere*, 15, 909–925, <https://doi.org/10.5194/tc-15-909-2021>, 2021.
- 375 Christie, F. D. W., Benha, T. J., Batchelor, C. L., Rack, W., Montelli, A., and Dowdeswell, J. A.: Antarctic ice-shelf advance driven by anomalous atmospheric and sea-ice circulation, *Nature Geoscience*, 15, 356–362, <https://doi.org/10.1038/s41561-022-00938-x>, 2022.
- Christoffersen, P., O’Leary, M., Van Angelen, J. H., and Van Den Broeke, M.: Partitioning effects from ocean and atmosphere on the calving stability of Kangerdlugssuaq Glacier, East Greenland, *Annals of Glaciology*, 53, 249–256, <https://doi.org/10.3189/2012AoG60A087>, 2012.
- 380 Cook, A. J. and Vaughan, D. G.: Overview of areal changes of the ice shelves on the Antarctic Peninsula over the past 50 years, *The Cryosphere*, 4, 77–98, <https://doi.org/10.5194/tc-4-77-2010>, 2010.
- Cornford, S. L., Martin, D. F., Graves, D. T., Ranken, D. F., Le Brocq, A. M., Gladstone, R. M., Payne, A. J., Ng, E. G., and Lipscomb, W. H.: Adaptive mesh, finite volume modeling of marine ice sheets, *Journal of Computational Physics*, 232, 529–549, <https://doi.org/10.1016/j.jcp.2012.08.037>, 2013.
- 390 Cornford, S. L., Martin, D. F., Payne, A. J., Ng, E. G., Le Brocq, A. M., Gladstone, R. M., Edwards, T. L., Shannon, S. R., Agosta, C., van den Broeke, M. R., Hellmer, H. H., Krinner, G., Ligtenberg, S. R. M., Timmermann, R., and Vaughan, D. G.: Century-scale simulations of the response of the West Antarctic Ice Sheet to a warming climate, *The Cryosphere*, 9, 1579–1600, <https://doi.org/10.5194/tc-9-1579-2015>, 2015.
- Davison, B. J., Hogg, A. E., Rigby, R., Veldhuijsen, S., van Wessem, J. M., van den Broeke, M. R., Holland, P. R., Selley, H. L., and Dutrieux, P.: Sea level rise from West Antarctic mass loss significantly modified by large snowfall anomalies, *Nature Communications*, 14, 1479, <https://doi.org/10.1038/s41467-023-36990-3>, 2023.
- 395 Fraser, A. D., Massom, R. A., Handcock, M. S., Reid, P., Ohshima, K. I., Raphael, M. N., Cartwright, J., Klekociuk, A. R., Wang, Z., and Porter-Smith, R.: Eighteen-year record of circum-Antarctic landfast-sea-ice distribution allows detailed baseline characterisation and reveals trends and variability, *The Cryosphere*, 15, 5061–5077, <https://doi.org/10.5194/tc-15-5061-2021>, 2021.
- 400 Fraser, A. D., Wongpan, P., Langhorne, P. J., Klekociuk, A. R., Kusahara, K., Lannuzel, D., Massom, R. A., Meiners, K. M., Swadling, K. M., Atwater, D. P., Brett, G. M., Corkill, M., Dalman, L. A., Fiddes, S., Granata, A., Guglielmo, L., Heil, P., Leonard, G. H., Mahoney, A. R., McMinn, A., van der Merwe, P., Weldrick, C. K., and Wienecke, B.: Antarctic Landfast Sea Ice: A Review of Its Physics, Biogeochemistry and Ecology, *Reviews of Geophysics*, 61, e2022RG000770, <https://doi.org/https://doi.org/10.1029/2022RG000770>, e2022RG000770 2022RG000770, 2023.
- 405 Fürst, J. J., Durand, G., Gillet-Chaulet, F., Tavard, L., Rankl, M., Braun, M., and Gagliardini, O.: The safety band of Antarctic ice shelves, *Nature Climate Change*, 6, 479–482, <https://doi.org/10.1038/nclimate2912>, 2016.
- Goldberg, D. N. and Sergienko, O. V.: Data assimilation using a hybrid ice flow model, *The Cryosphere*, 5, 315–327, <https://doi.org/10.5194/tc-5-315-2011>, 2011.

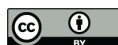

- Gourmelen, N., Goldberg, D. N., Snow, K., Henley, S. F., Bingham, R. G., Kimura, S., Hogg, A. E., Shepherd, A., Mouginot, J., Lenaerts, J.,  
410 T. M., Ligtenberg, S. R. M., and van de Berg, W. J.: Channelized Melting Drives Thinning Under a Rapidly Melting Antarctic Ice Shelf,  
Geophysical Research Letters, 44, 9796–9804, <https://doi.org/10.1002/2017GL074929>, 2017.
- Gudmundsson, G. H.: Ice-shelf buttressing and the stability of marine ice sheets, *The Cryosphere*, 7, 647–655, <https://doi.org/10.5194/tc-7-647-2013>, 2013.
- Hansen, P. C.: Regularization tools: A Matlab package for analysis and solution of discrete ill-posed problems, *Numerical algorithms*, 6,  
415 1–35, <https://doi.org/10.1007/BF02149761>, 1994.
- Haran, T. M., Bohlander, J., Scambos, T. A., Painter, T. H., and Fahnestock, M. A.: MODIS Mosaic of Antarctica 2003–2004 (MOA2004)  
Image Map, Version 2, <https://doi.org/10.5067/68TBT0CGJSOJ>, 2021.
- Hibler, W. D.: A dynamic thermodynamic sea ice model, *Journal of physical oceanography*, 9, 815–846, [https://doi.org/10.1175/1520-0485\(1979\)009<0815:ADTSIM>2.0.CO;2](https://doi.org/10.1175/1520-0485(1979)009<0815:ADTSIM>2.0.CO;2), 1979.
- 420 Hogg, A. E., Shepherd, A., Cornford, S. L., Briggs, K. H., Gourmelen, N., Graham, J. A., Joughin, I., Mouginot, J., Nagler, T., Payne,  
A. J., Rignot, E., and Wuite, J.: Increased ice flow in Western Palmer Land linked to ocean melting, *Geophysical Research Letters*, 44,  
4159–4167, <https://doi.org/https://doi.org/10.1002/2016GL072110>, 2017.
- Holdsworth, G. and Glynn, J.: Iceberg calving from floating glaciers by a vibrating mechanism, *Nature*, 274, 464–466,  
<https://doi.org/10.1038/274464a0>, 1978.
- 425 Howat, I. M., Porter, C., Smith, B. E., Noh, M.-J., and Morin, P.: The Reference Elevation Model of Antarctica, *The Cryosphere*, 13, 665–674,  
<https://doi.org/10.5194/tc-13-665-2019>, 2019.
- Hunke, E. C. and Dukowicz, J. K.: An elastic–viscous–plastic model for sea ice dynamics, *Journal of Physical Oceanography*, 27, 1849–1867,  
[https://doi.org/10.1175/1520-0485\(1997\)027<1849:AEVPMF>2.0.CO;2](https://doi.org/10.1175/1520-0485(1997)027<1849:AEVPMF>2.0.CO;2), 1997.
- Huss, M. and Farinotti, D.: A high-resolution bedrock map for the Antarctic Peninsula, *The Cryosphere*, 8, 1261–1273,  
430 <https://doi.org/10.5194/tc-8-1261-2014>, 2014.
- Joughin, I. and Alley, R. B.: Stability of the West Antarctic ice sheet in a warming world, *Nature Geoscience*, 4, 506–513,  
<https://doi.org/10.1038/ngeo1194>, 2011.
- Joughin, I., Smith, B. E., and Schoof, C. G.: Regularized Coulomb Friction Laws for Ice Sheet Sliding: Application to Pine Island Glacier,  
Antarctica, *Geophysical Research Letters*, 46, 4764–4771, <https://doi.org/https://doi.org/10.1029/2019GL082526>, 2019.
- 435 Massom, R. A., Scambos, T. A., Bennetts, L. G., Reid, P., Squire, V. A., and Stammerjohn, S. E.: Antarctic ice shelf disintegration triggered  
by sea ice loss and ocean swell, *Nature*, 558, 383–389, <https://doi.org/10.1038/s41586-018-0212-1>, 2018.
- Mouginot, J., Scheuchl, B., and Rignot, E.: MEaSURES Antarctic Boundaries for IPY 2007–2009 from Satellite Radar, Version 2, boulder,  
Colorado USA. NASA National Snow and Ice Data Center Distributed Active Archive Center. doi: <http://dx.doi.org/10.5067/AXE4121732AD>. Accessed 14/02/2023., 2017.
- 440 Ochwat, N. E., Scambos, T. A., Banwell, A. F., Anderson, R. S., Maclennan, M. L., Picard, G., Shates, J. A., Marinsek, S., Margonari,  
L., Truffer, M., and Pettit, E. C.: Triggers of the 2022 Larsen B multi-year landfast sea ice break-out and initial glacier response, *The  
Cryosphere Discussions*, 2023, 1–34, <https://doi.org/10.5194/tc-2023-88>, in review, 2023.
- Otosaka, I. N., Shepherd, A., Ivins, E. R., Schlegel, N.-J., Amory, C., van den Broeke, M. R., Horwath, M., Joughin, I., King, M. D., Krinner,  
G., Nowicki, S., Payne, A. J., Rignot, E., Scambos, T., Simon, K. M., Smith, B. E., Sørensen, L. S., Velicogna, I., Whitehouse, P. L., A,  
445 G., Agosta, C., Ahlstrøm, A. P., Blazquez, A., Colgan, W., Engdahl, M. E., Fettweis, X., Forsberg, R., Gallée, H., Gardner, A., Gilbert, L.,  
Gourmelen, N., Groh, A., Gunter, B. C., Harig, C., Helm, V., Khan, S. A., Kittel, C., Konrad, H., Langen, P. L., Lecavalier, B. S., Liang, C.-





- C., Loomis, B. D., McMillan, M., Melini, D., Mernild, S. H., Mottram, R., Mougnot, J., Nilsson, J., Noël, B., Pattle, M. E., Peltier, W. R., Pie, N., Roca, M., Sasgen, I., Save, H. V., Seo, K.-W., Scheuchl, B., Schrama, E. J. O., Schröder, L., Simonsen, S. B., Slater, T., Spada, G., Sutterley, T. C., Vishwakarma, B. D., van Wessem, J. M., Wiese, D., van der Wal, W., and Wouters, B.: Mass balance of the Greenland and Antarctic ice sheets from 1992 to 2020, *Earth System Science Data*, 15, 1597–1616, <https://doi.org/10.5194/essd-15-1597-2023>, 2023.
- 450 Pattyn, F. and Morlighem, M.: The uncertain future of the Antarctic Ice Sheet, *Science*, 367, 1331–1335, <https://doi.org/10.1126/science.aaz5487>, 2020.
- Recinos, B., Goldberg, D., Maddison, J. R., and Todd, J.: A framework for time-dependent Ice Sheet Uncertainty Quantification, applied to three West Antarctic ice streams, *The Cryosphere Discussions*, 2023, 1–46, <https://doi.org/10.5194/tc-2023-27>, 2023.
- 455 Rignot, E., Casassa, G., Gogineni, P., Krabill, W., Rivera, A., and Thomas, R.: Accelerated ice discharge from the Antarctic Peninsula following the collapse of Larsen B ice shelf, *Geophysical Research Letters*, 31, <https://doi.org/https://doi.org/10.1029/2004GL020697>, 2004.
- Robel, A. A.: Thinning sea ice weakens buttressing force of iceberg mélange and promotes calving, *Nature Communications*, 8, 14 596, <https://doi.org/10.1038/ncomms14596>, 2017.
- 460 Rott, H., Abdel Jaber, W., Wuite, J., Scheiblauer, S., Floricioiu, D., van Wessem, J. M., Nagler, T., Miranda, N., and van den Broeke, M. R.: Changing pattern of ice flow and mass balance for glaciers discharging into the Larsen A and B embayments, Antarctic Peninsula, 2011 to 2016, *The Cryosphere*, 12, 1273–1291, <https://doi.org/10.5194/tc-12-1273-2018>, 2018.
- Scambos, T. A., Bohlander, J. A., Shuman, C. A., and Skvarca, P.: Glacier acceleration and thinning after ice shelf collapse in the Larsen B embayment, *Antarctica, Geophysical Research Letters*, 31, <https://doi.org/https://doi.org/10.1029/2004GL020670>, 2004.
- 465 Schoof, C.: The effect of cavitation on glacier sliding, *Proceedings of the Royal Society A: Mathematical, Physical and Engineering Sciences*, 461, 609–627, <https://doi.org/10.1098/rspa.2004.1350>, 2005.
- Shean, D. E., Joughin, I. R., Dutrieux, P., Smith, B. E., and Berthier, E.: Ice shelf basal melt rates from a high-resolution digital elevation model (DEM) record for Pine Island Glacier, Antarctica, *The Cryosphere*, 13, 2633–2656, <https://doi.org/10.5194/tc-13-2633-2019>, 2019.
- Slater, T., Lawrence, I. R., Otosaka, I. N., Shepherd, A., Gourmelen, N., Jakob, L., Tepes, P., Gilbert, L., and Nienow, P.: Review article: Earth's ice imbalance, *The Cryosphere*, 15, 233–246, <https://doi.org/10.5194/tc-15-233-2021>, 2021.
- 470 Smith, B., Fricker, H. A., Gardner, A. S., Medley, B., Nilsson, J., Paolo, F. S., Holschuh, N., Adusumilli, S., Brunt, K., Csatho, B., Harbeck, K., Markus, T., Neumann, T., Siegfried, M. R., and Zwally, H. J.: Pervasive ice sheet mass loss reflects competing ocean and atmosphere processes, *Science*, 368, 1239–1242, <https://doi.org/10.1126/science.aaz5845>, 2020.
- Squire, V. A.: Ocean Wave Interactions with Sea Ice: A Reappraisal, *Annual Review of Fluid Mechanics*, 52, 37–60, <https://doi.org/10.1146/annurev-fluid-010719-060301>, 2020.
- 475 Sun, Y., Riel, B., and Minchew, B.: Disintegration and Buttressing Effect of the Landfast Sea Ice in the Larsen B Embayment, Antarctic Peninsula, *Authorea Preprints*, in review, 2023.
- Trusel, L. D., Frey, K. E., Das, S. B., Karnauskas, K. B., Kuipers Munneke, P., Van Meijgaard, E., and Van Den Broeke, M. R.: Divergent trajectories of Antarctic surface melt under two twenty-first-century climate scenarios, *Nature Geoscience*, 8, 927–932, <https://doi.org/10.1038/ngeo2563>, 2015.
- 480 Turner, J., Holmes, C., Caton Harrison, T., Phillips, T., Jena, B., Reeves-Francois, T., Fogt, R., Thomas, E. R., and Bajaj, C. C.: Record Low Antarctic Sea Ice Cover in February 2022, *Geophysical Research Letters*, 49, e2022GL098904, <https://doi.org/https://doi.org/10.1029/2022GL098904>, e2022GL098904 2022GL098904, 2022.



- 485 Voermans, J. J., Liu, Q., Marchenko, A., Rabault, J., Filchuk, K., Ryzhov, I., Heil, P., Waseda, T., Nose, T., Kodaira, T., Li, J., and Babanin, A. V.: Wave dispersion and dissipation in landfast ice: comparison of observations against models, *The Cryosphere*, 15, 5557–5575, <https://doi.org/10.5194/tc-15-5557-2021>, 2021.
- Wallis, B. J., Hogg, A. E., van Wessem, J. M., Davison, B. J., and van den Broeke, M. R.: Widespread seasonal speed-up of west Antarctic Peninsula glaciers from 2014 to 2021, *Nature Geoscience*, 16, 231–237, <https://doi.org/10.1038/s41561-023-01131-4>, 2023.
- 490 Wallis, B. J., Hogg, A. E., Zhu, Y., and Hooper, A.: Mapping the grounding line of the Antarctic Peninsula in 2019-2020 with a tidal correlation method shows retreat in the north-east sector, *In Prep*.
- Wuite, J., Rott, H., Hetzenecker, M., Floricioiu, D., De Rydt, J., Gudmundsson, G. H., Nagler, T., and Kern, M.: Evolution of surface velocities and ice discharge of Larsen B outlet glaciers from 1995 to 2013, *The Cryosphere*, 9, 957–969, <https://doi.org/10.5194/tc-9-957-2015>, 2015.



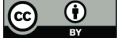

505 We use L-curve analysis to find optimal values of  $\alpha_C$  and  $\alpha_\phi$  (Fig. A1). This is a heuristic method that posits that the optimal values of the regularisation parameters lead to a solution that balances sensitivities of the misfit and regularisation parts of the cost function to changes in their relative weights (Hansen, 1994). Given the tendency for L-curve analysis to over-regularise, we take the values to the immediate right of the position of maximum curvature in the L-curves, namely  $\alpha_C = 1$ ,  $\alpha_\phi = 10^9$ .

## A2 Calculating gradients of ice speed using the model adjoint

510 Fig. 3 displays the gradient of the functional:

$$J(u(C, \phi)) = \int |u| d\Omega_{HC}$$

with respect to the field  $\phi$ , where the domain  $\Omega_{HC}$  is a union between the neighbourhoods marked by coloured circles in Fig. 3 a. We write  $J(u(C, \phi))$  as  $\tilde{J}(C, \phi)$ , a pure functional of  $C$  and  $\phi$ . The Gâteaux derivative of  $\tilde{J}(C, \phi)$  with respect to  $\phi$  in the direction  $\delta\phi$  can be written:

$$515 \langle D\tilde{J}, \delta\phi \rangle = \lim_{\epsilon \rightarrow 0} \frac{\tilde{J}(C, \phi + \epsilon\delta\phi) - \tilde{J}(C, \phi)}{\epsilon}.$$

We approximate this as

$$\langle D\tilde{J}, \delta\phi \rangle \approx \int \delta\phi \times \bar{\mu}h\nabla\lambda (\nabla\mathbf{u} + (\nabla\mathbf{u})^\top + 2(\nabla \cdot \mathbf{u})\mathcal{I}) d\Omega \quad (\text{A3})$$

where the vector field  $\lambda$  are a vector field of lagrange multipliers that solve the adjoint equation:

$$-\nabla \cdot [\phi h \bar{\mu} (\nabla\lambda + (\nabla\lambda)^\top + 2(\nabla \cdot \lambda)\mathcal{I})] + C\lambda = \begin{cases} \hat{\mathbf{u}}, & \text{in } \Omega_{HC} \\ 0, & \text{elsewhere} \end{cases} \quad (\text{A4})$$

520 with reflection boundary conditions on the domain boundary:

$$\hat{\mathbf{n}} \cdot \lambda = 0,$$

$$\hat{\mathbf{t}} \cdot \nabla\lambda \cdot \hat{\mathbf{n}} = 0$$

(where  $\hat{\mathbf{n}}$  and  $\hat{\mathbf{t}}$  are normal and tangent vectors to the boundary respectively).

To construct (A4), we have neglected non-linearities in the dependence of  $\bar{\mu}$  on  $\mathbf{u}$ , and in the sliding law (Goldberg and  
 525 Sergienko, 2011). The field we show in Fig. 3 comes from interpreting eq (A3) as the projection of the functional gradient



along the direction  $\delta\phi$  with the standard  $L_2$  inner product. Hence, the gradient shown in Fig. 3 is the field:

$$\bar{\mu}h\nabla\lambda(\nabla\mathbf{u} + (\nabla\mathbf{u})^\top + 2(\nabla\cdot\mathbf{u})\mathcal{I})$$

### A3 Sensitivity to sliding physics

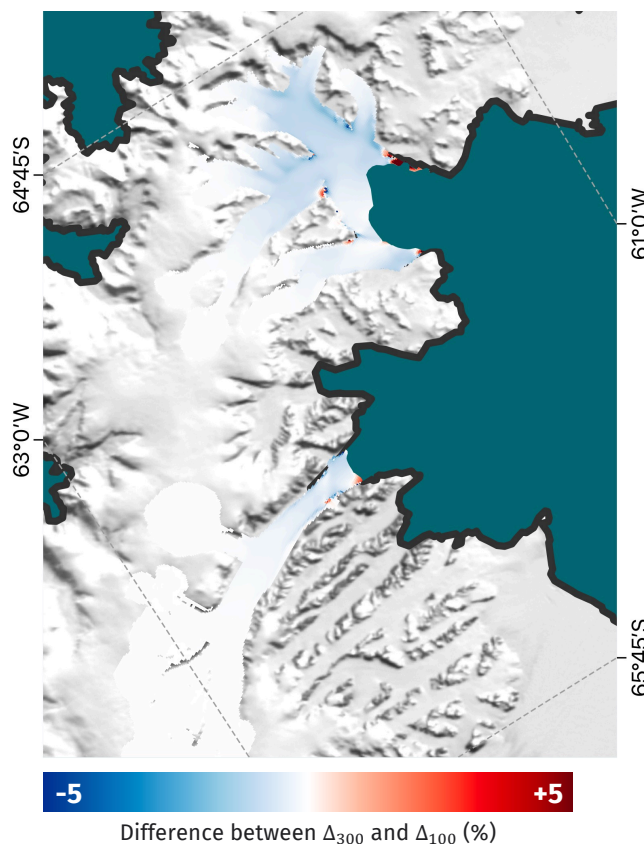

**Figure A2.** Difference between  $\Delta_{100}$  and  $\Delta_{300}$  - the percentage change in ice speed with the addition of 50 m of landfast sea ice for  $u_o = 100 \text{ m a}^{-1}$  and  $u_o = 300 \text{ m a}^{-1}$  respectively. The background image is the MODIS MOA (Haran et al., 2021), and the black line is the glacier boundary according to Mouginot et al. (2017).

For the simulations presented in this article, we used a Regularised-Coulomb sliding law for basal stress  $\tau_b$  in terms of basal ice velocity  $\mathbf{u}_b$  of the form:

$$\tau_b = - \left( \frac{|\mathbf{u}_b|}{|\mathbf{u}_b|/u_o + 1} \right)^m \frac{\mathbf{u}_b}{|\mathbf{u}_b|} \quad (\text{A5})$$

with a Weertman-like exponent of  $m = 1/3$  and a threshold ice speed of  $u_o = 300 \text{ m a}^{-1}$  that represents a transition between viscous and plastic sliding (Joughin et al., 2019). This sliding law is physically plausible for the fast-flowing glaciers under





consideration, and allows for the greatest change in grounded ice speed with the small changes to viscous stress at the calving  
535 front brought about by the addition of sea ice. The value of  $u_o$  is the main control on how far these speed changes propagate  
upstream of the grounding line.

To ensure the conclusions of this study are independent of the chosen  $u_o$ , we also consider a value of  $u_o = 100 \text{ m a}^{-1}$ . For  
values of both  $100 \text{ m a}^{-1}$  and  $300 \text{ m a}^{-1}$ , the percentage difference in speed between between the cases of no sea ice and 50 m  
of sea ice was calculated. We call these  $\Delta_{100}$  and  $\Delta_{300}$  respectively. Fig. A2 shows the difference between these quantities.

540 We see that the difference is below 1% across the HGE and Crane basins. The transects shown in Fig. 2 c indicate changes  
in grounded ice speed with the addition of 50 m of landfast sea ice and a threshold ice speed of  $300 \text{ m a}^{-1}$  is on the order of  
5% where speed measurements were made.

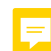

Supplement: Supplementary file [file tc-2023-128-RC1-supplement.pdf]
